# Supplementary material
Source: Springer Nature journal article supplement (https://www.springermedizin.de/resource/supplementary/12905_2009_180_MOESM1_ESM.pdf/9518154)

**HSV-2 Prevalence**

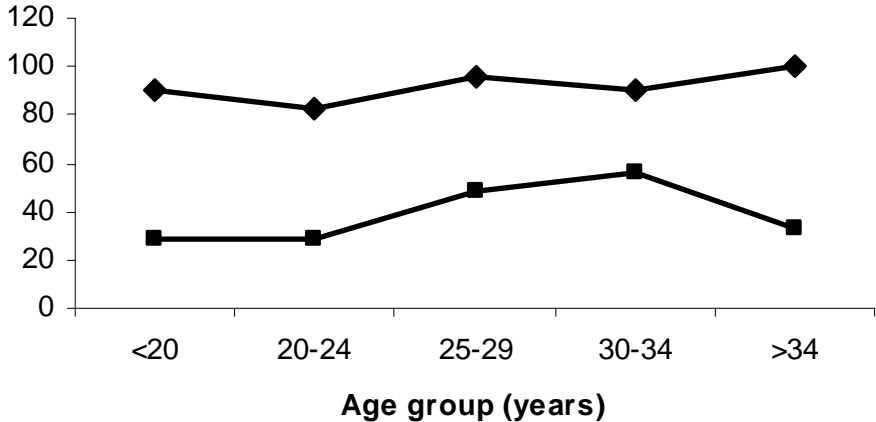

Supplement: MOESM1 [file 9518154]
